# Supplementary material for: Depth Refuge and the Impacts of SCUBA Spearfishing on Coral Reef Fishes
Source: PubMed Central journal article supplement (PMC3963921; doi:10.1371/journal.pone.0092628), 2014-03-24

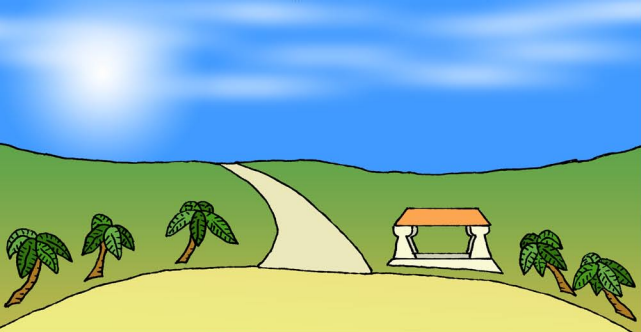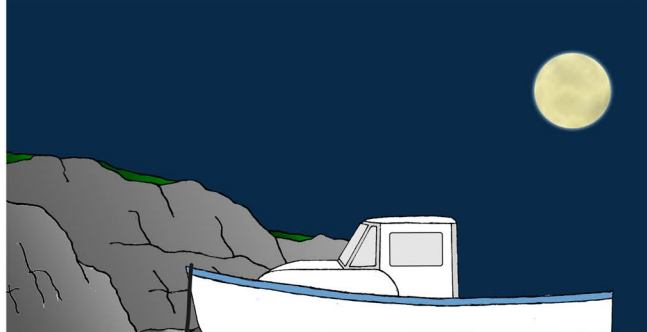

## Depth Refuge

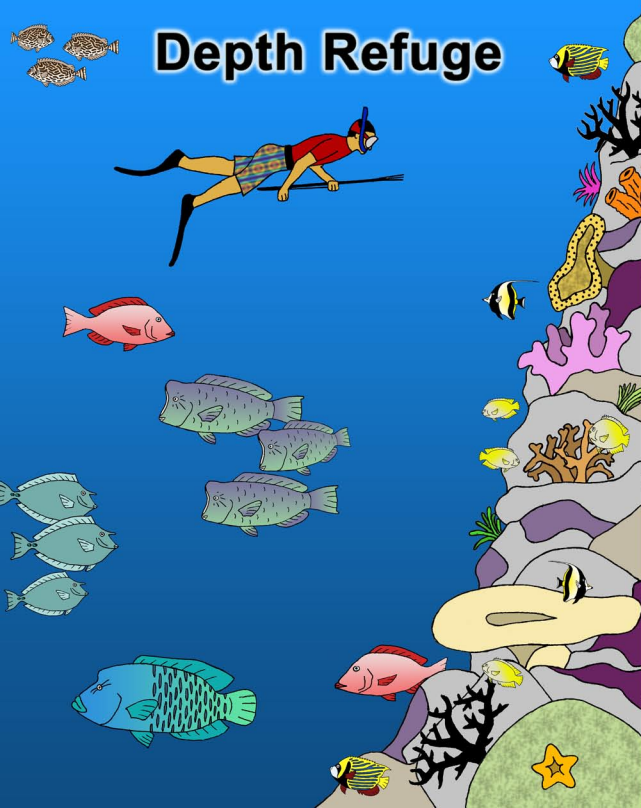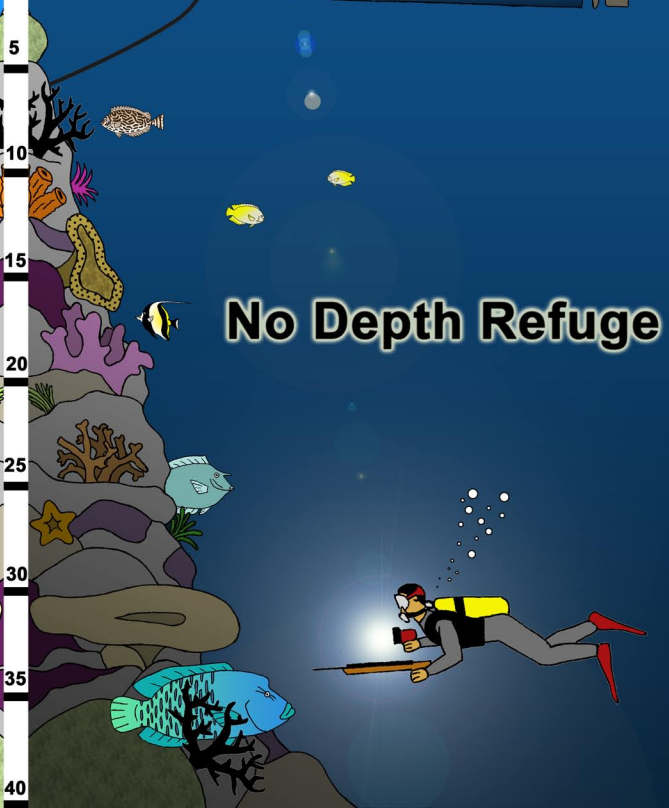

## No Depth Refuge

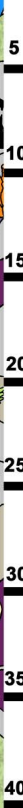

Supplement: pone.0092628.s001.pdf [file pone.0092628.s001.pdf]
